# Supplementary material
Source: publisher figshare collection journal article supplement (https://acs.figshare.com/ndownloader/files/14597405)
Supplement: Supplementary file 1 [file 14597405]

## *Supporting information*

### **Flame Reduced TiO<sub>2</sub> Nanorod Arrays with Ag Nanoparticle Decoration for Efficient Solar Water Splitting**

Biyi Chen<sup>†</sup>, Xue Chen<sup>†</sup>, Ruoyuan Li<sup>†</sup>, Weiqiang Fan<sup>†</sup>, Fagen Wang<sup>†</sup>, Baodong Mao<sup>†</sup>, Weidong Shi<sup>†\*</sup>

<sup>†</sup>School of Chemistry and Chemical Engineering, Jiangsu University, Zhenjiang 212013, P. R. China

\*E-mail: swd1978@ujs.edu.cn

#### **The preparation of BiVO<sub>4</sub> photoanodes**

The preparation of BiVO<sub>4</sub> photoanodes is based on steps for electrodepositing BiOI photoanodes following calcining at high temperature.<sup>S1</sup> Typically, A 0.04 M Bi(NO<sub>3</sub>)<sub>3</sub> solution was prepared by dissolving Bi(NO<sub>3</sub>)<sub>3</sub>·5H<sub>2</sub>O in 50 mL of a 0.4 M KI solution after its pH was adjusted to 1.7 by adding HNO<sub>3</sub>. This solution was mixed with 20 mL of absolute ethanol (100%) containing 0.23 M *p*-benzoquinone and was vigorously stirred for a few minutes. A typical three-electrode cell was used for electrodeposition. A fluorine-doped tin oxide (FTO) working electrode (WE), Ag/AgCl (saturated KCl) reference electrode (RE), and a platinum counter electrode (CE) were used. The CHI 852C electrochemical workstation was used for electrodeposition. The cathodic deposition was performed potentiostatically at -0.1 V vs. Ag/AgCl at RT with 5 min.

0.15 - 0.2 mL of a dimethyl sulfoxide (DMSO) solution containing 0.2 M vanadyl acetylacetonate (VO(acac)<sub>2</sub>) was placed on the BiOI electrode and was heated in a muffle

furnace at varying temperatures (450 °C) and for 2 h in air to convert BiOI to BiVO<sub>4</sub>. Excess V<sub>2</sub>O<sub>5</sub> present in the BiVO<sub>4</sub> electrodes was removed by soaking them in 1 M NaOH solution for 30 min with gentle stirring. The resulting pure BiVO<sub>4</sub> electrodes were rinsed with DI water and dried at an oven.

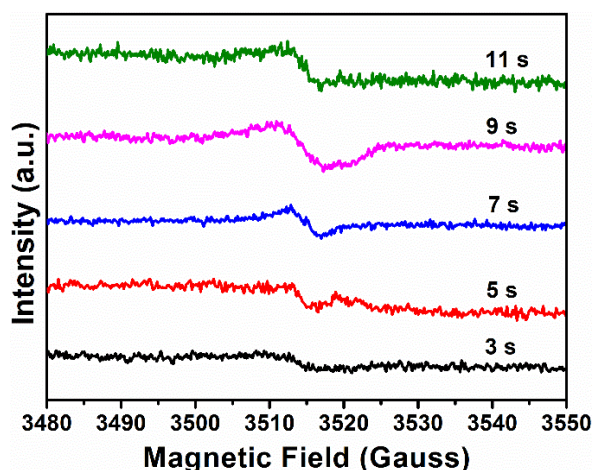

**Figure S1.** The EPR spectra of TiO<sub>2</sub>-FR at different reduction time (3 – 11 s).

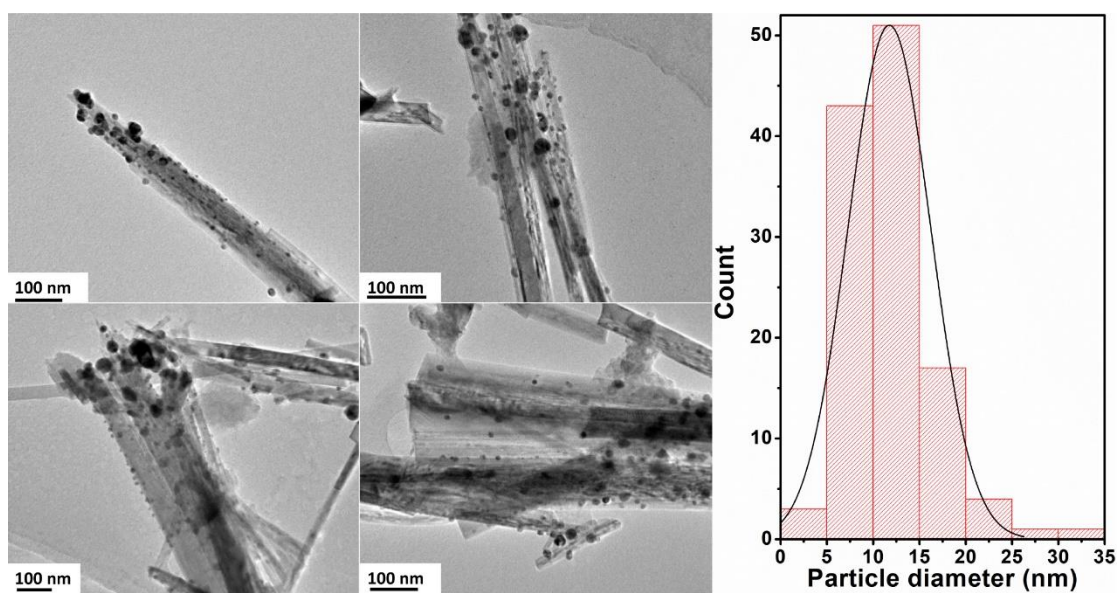

**Figure S2.** The TEM views of Ag-TiO<sub>2</sub>-FR 7 s and the size distribution of Ag nanoparticles.

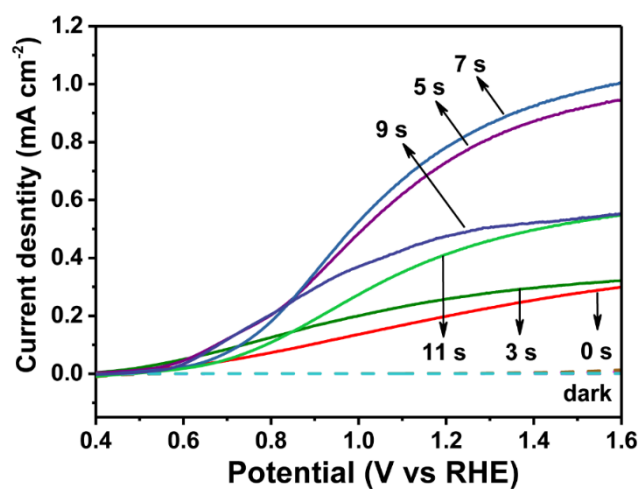

**Figure S3.** The  $J$ - $V$  curves for TiO<sub>2</sub> with different flame reduction time (0 – 11 s).

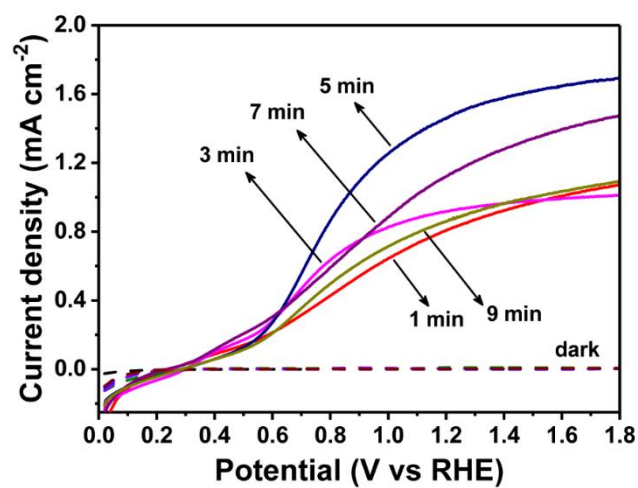

**Figure S4.** The  $J$ - $V$  curves for TiO<sub>2</sub> – FR 7 s with PEC cathodic reduction AgNO<sub>3</sub> at different times (1 – 9 min).

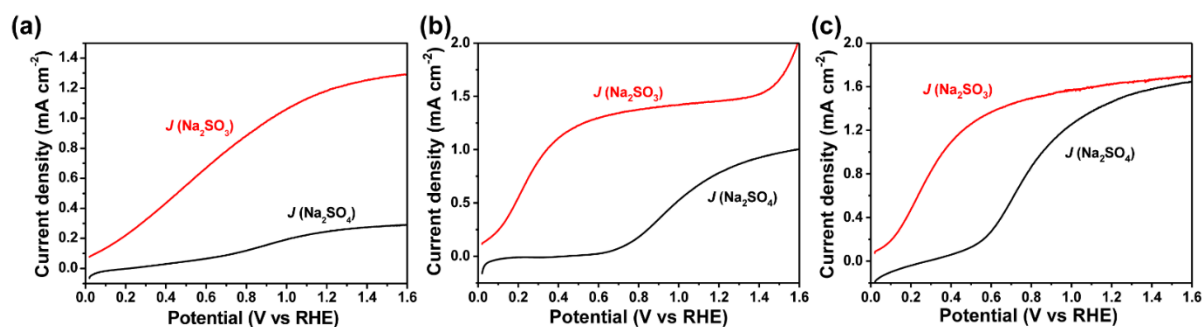

**Figure S5.** The  $J$ - $V$  curves under the conditions of 0.5 M Na<sub>2</sub>SO<sub>4</sub> containing 0.5 M Na<sub>2</sub>SO<sub>3</sub> for (a) pristine TiO<sub>2</sub>, (b) TiO<sub>2</sub>-FR 7 s, (c) Ag-TiO<sub>2</sub>-FR 7 s.

## References

(S1) Kim, T. W.; Choi, K. S. Nanoporous BiVO<sub>4</sub> Photoanodes with Dual-Layer Oxygen Evolution Catalysts for Solar Water Splitting. *Science* **2014**, *343*, 990-994.
